# Supplementary material
Source: MDPI journal article supplement (https://www.mdpi.com/2077-0472/13/7/1318)
Supplement: s1 [file s1]

## Supplementary Material

**Table S1.** Mean, minimum and maximum temperatures during 2019 and 2021.

| Temperature °C | 2019         | 2021         | <i>p</i> |
|----------------|--------------|--------------|----------|
| Maximum        | 31.68 ± 4.18 | 31.72 ± 4.90 | 0.95     |
| Mean           | 23.78 ± 3.55 | 23.61 ± 4.07 | 0.77     |
| Minimum        | 15.87 ± 3.29 | 15.49 ± 3.62 | 0.46     |

Data are presented as mean ± standard deviation from May to July in both years.
